# Supplementary material for: Garlic Ecotypes Utilise Different Morphological, Physiological and Biochemical Mechanisms to Cope with Drought Stress
Source: MDPI journal article supplement (doi:10.3390/plants12091824), 2023-04-28
Supplement: s1 [file s1]

# Supplementary Materials

**Table S1.** Average values of morphological and physiological characteristics, and chlorophyll fluorescence parameters from main factors.

| Characteristic                 | Genotype |        | Treatment |        |
|--------------------------------|----------|--------|-----------|--------|
|                                | IB       | IC     | C         | D      |
| Plant height (cm)              | 32.27    | 34.22  | 36.32*    | 30.17  |
| Leaves number                  | 3.83     | 3.74   | 4.65*     | 2.92   |
| Rooth length (cm)              | 12.11    | 19.58* | 12.84     | 18.86* |
| Plant weight (g)               | 3.82     | 6.75*  | 6.39*     | 4.18   |
| Red                            | 1446*    | 1279   | 1287      | 1438*  |
| Green                          | 2100*    | 1933   | 1955      | 2078   |
| Blue                           | 1451*    | 1255   | 1324      | 1383   |
| Far red                        | 3437     | 3267   | 3252      | 3452   |
| NIR                            | 11633    | 11611  | 11742     | 11502  |
| HUE                            | 129      | 125    | 129       | 125    |
| SAT                            | 0.37     | 0.41*  | 0.39      | 0.40   |
| VAL                            | 0.032*   | 0.029  | 0.030     | 0.032  |
| CHI                            | 2.48     | 2.61*  | 2.65*     | 2.43   |
| ARI                            | 1.97     | 2.19*  | 2.10      | 2.07   |
| NDVI                           | 0.63     | 0.64   | 0.64      | 0.62   |
| GI                             | 0.26     | 0.31*  | 0.28      | 0.29   |
| F <sub>0</sub>                 | 1652     | 1825*  | 1773      | 1704   |
| F <sub>v</sub> /F <sub>m</sub> | 0.83     | 0.83   | 0.84*     | 0.82   |
| F <sub>s</sub>                 | 2925     | 3093   | 3051      | 2968   |
| F <sub>m</sub>                 | 9961     | 11025* | 11027*    | 9959   |
| F <sub>q</sub> /F <sub>m</sub> | 0.47     | 0.48   | 0.48      | 0.47   |
| ETR                            | 11491    | 12176  | 12208     | 11459  |
| NPQ                            | 0.87     | 0.92   | 0.95      | 0.84   |

\* indicate significance at  $p < 0.05$  among the genotypes and treatments. C: control, D: drought, IB: Istarski bijeli, IC: 'Istarski crveni'.

**Table S2.** Average values of biochemical characteristics from main factors.

| Characteristic                     | Genotype |        | Treatment |        |
|------------------------------------|----------|--------|-----------|--------|
|                                    | IB       | IC     | C         | D      |
| TPC (mg GAL g <sup>-1</sup> DW)    | 18.02    | 19.92* | 19.46     | 18.50  |
| DPPH (μmol TEQ g <sup>-1</sup> DW) | 8.43     | 9.89*  | 9.13      | 9.20   |
| FRAP (μmol TEQ g <sup>-1</sup> DW) | 10.23    | 15.37* | 13.98*    | 11.69  |
| Sucrose (g 100 g <sup>-1</sup> DW) | 2.80*    | 2.48   | 1.85      | 3.43*  |
| Glucose (g 100 g <sup>-1</sup> DW) | 4.74*    | 3.50   | 5.02*     | 3.23   |
| Inulin (g 100 g <sup>-1</sup> DW)  | 2.07     | 3.15*  | 2.72*     | 2.50   |
| Proline                            | 1.22     | 1.27   | 0.88      | 1.61*  |
| Asparagine                         | 3.95     | 5.02*  | 2.60      | 6.37*  |
| Glutamine                          | 5.81     | 6.69*  | 3.49      | 9.01*  |
| Serine                             | 5.09     | 5.76*  | 3.92      | 6.94*  |
| Histidine                          | 0.48     | 0.46   | 0.36      | 0.58*  |
| Glycine                            | 1.16*    | 0.93   | 0.80      | 1.29*  |
| Threonine                          | 1.09     | 1.05   | 0.71      | 1.43*  |
| Arginine                           | 3.17     | 4.20*  | 1.50      | 5.87*  |
| Alanine                            | 1.90     | 1.98   | 1.55      | 2.33*  |
| Tyrosine                           | 0.39*    | 0.29   | 0.27      | 0.41*  |
| Methionine                         | 0.26*    | 0.22   | 0.22      | 0.27*  |
| Phenylalanine                      | 0.37*    | 0.28   | 0.28      | 0.37*  |
| Isoleucine                         | 0.41*    | 0.30   | 0.28      | 0.43*  |
| Leucine                            | 0.75*    | 0.55   | 0.55      | 0.75*  |
| Lysine                             | 1.42*    | 1.21   | 1.01      | 1.63*  |
| AA                                 | 28.36    | 30.87* | 18.94     | 40.29* |

\* indicate significance at  $p < 0.05$  among the genotypes and treatments. C: control, D: drought, IB: Istarski bijeli, IC: 'Istarski crveni', AA: total content of all analysed free amino acids.
